# Supplementary material for: Identification and Functional Analysis of the CLAVATA3/EMBRYO SURROUNDING REGION (CLE) Gene Family in Wheat
Source: MDPI journal article supplement (doi:10.3390/ijms20174319), 2019-09-03
Supplement: s1 [file s1]

**Supplementary Table S1 The information on synthetic peptides**

| Peptide Name | Sequence       | Purity |
|--------------|----------------|--------|
| TaCLE3p      | KRLVPQGP NPLHN | 98.13% |
| TaCLE34p     | KRSSPGGPD PQHH | 96.76% |
