# Supplementary material for: Identification and Functional Analysis of the CLAVATA3/EMBRYO SURROUNDING REGION (CLE) Gene Family in Wheat
Source: MDPI journal article supplement (doi:10.3390/ijms20174319), 2019-09-03
Supplement: s1 [file s1]

## Signal peptide

|            |   |                                                                         |                                              |
|------------|---|-------------------------------------------------------------------------|----------------------------------------------|
| TaCLE1a    | 1 | --MRRPGGA-----APVVVLLMMA-----                                           | ALTFAFHGCGGG--LLRCGSSVAVVERDRRPASLPRKMLLAVES |
| TaCLE1d    | 1 | --MRRPGGA-----APVVVLLMMA-----                                           | ALTFAFHGCGGG--LLVRGSSVAVVERDRRPASLPRKMLLAVES |
| TaCLE1b    | 1 | --MRRPGGA-----APVVVLLMMA-----                                           | ALTFAFHGCGGG--LLRCG--LAVQLD--HPASLPRKMLLVVES |
| TaCLE15a   | 1 | --MVRDTGGA-----LQL-LAVLLELV-----                                        | ASELATFSCGHR-----I-PRADVAAWK--               |
| TaCLE15b   | 1 | --MVRDTGGA-----LQL-LAVLLELV-----                                        | ASELATFSCGHR-----I-PRADVAAWK--               |
| TaCLE15d   | 1 | --MVRDTGGA-----LHL-LAVLLELV-----                                        | ASELATFSCGHR-----I-PRADVAAWK--               |
| TaCLE28b   | 1 | --MRRRAGGAGTPPLPDTLSVSLLELV-----                                        | ATELGTAACVCG-----VLKADAVAAA--                |
| TaCLE28d   | 1 | --MRRRAGGAGAPPLPDTLSVSLLELV-----                                        | ATELGTAACVCG-----VLKADAVASA--                |
| TaCLE3b    | 1 | --MARSRD-----RLRLTELVAV-----                                            | LLVVDVAVSVCHG-----RRTP--DVDAM--              |
| TaCLE3d    | 1 | --MARSRD-----RLRLTELVAV-----                                            | LLVVDVAVSVSHG-----RRTP--DVDAM--              |
| TaCLE3a    | 1 | --MARSRD-----RLRLTELVAV-----                                            | LLVVDVAVSVSHG-----RRTP--DVDAM--              |
| TaCLE30b   | 1 | --MRRPSQQH-----SLLPCILLEML-----                                         | VSMSSH-PSSSHG-----LRTLREEEEAVG--             |
| TaCLE30d   | 1 | --MRRSSQQH-----SLLPCILLEML-----                                         | AMSH-PSSSHG-----LRTLREEEEAVG--               |
| TaCLE30a   | 1 | --MRRSSQQH-----SLLPCILLEML-----                                         | VSMSC-PSSSHG-----LRTLREEEEAVG--              |
| TaCLE5a    | 1 | --MARSWSCA-----LRLFLASLLILCSALPPPPPP--GRGSAT----                        | ELTDADEAVIARMCNPRAG-----PRPAWCEELHLIK        |
| TaCLE5d    | 1 | --MGRSWSCA-----LRLFLASLLILCSALPPPPPP--GRGSASASPAELTADEAVIARMCNPRAG----- | PRPAWCEELHLIR                                |
| TaCLE5b    | 1 | --MARSCSCA-----LRLFLASLLILCSAPPPPPPPPPGRGSAS--PAELTADEAVIARMCNPRAG----- | PRPAWCEELHLIR                                |
| TaCLE2a    | 1 | -----MN-----CVKILVLSLI-----                                             | PLALRGASLL-----VVPSPSPADSAS                  |
| TaCLE2d    | 1 | -----MN-----CVKILVLSLI-----                                             | PLALRGASLL-----VVPSPSPDSAS                   |
| TaCLE2b    | 1 | -----MN-----CVKILVLSLI-----                                             | PLALRGASLL-----VVPSPSPA-DPAS                 |
| TaCLE20a   | 1 | --MGGGVVRC-----CVKILALSLV-----                                          | PLALRAGSLLGH-----VVAPPPSSARPA                |
| TaCLE20d   | 1 | --MGGGVVRC-----CVKILALSLV-----                                          | PLALRAGSFLGH-----VVAPPPSSARPA                |
| TaCLE20b   | 1 | --MGG--VVR-----CVKILALSLV-----                                          | PLALRAGSLLGH-----VVAPPPSS----A               |
| TaCLE14b   | 1 | --MRVPSLAL-----AILVLASAA-----                                           | TGRPAVIAARTP-----GVLLAPTSSRGVD               |
| TaCLE14d   | 1 | --MRVPSLAL-----AILVLASAG-----                                           | TSRPGVIAARSP-----GVLLAPTSSRGVE               |
| TaCLE14a   | 1 | --MRVPSLAL-----AILVLASAA-----                                           | TGRPGVIAARSP-----GVLLASTSRRGAE               |
| TaCLE21b   | 1 | -----MVCCSRR-----                                                       | RDTPAAGGLGSG-----WLLIAVLVQSSLL               |
| TaCLE21d   | 1 | -----MVCCSRR-----                                                       | RDRPAAGGLGSG-----WLLIAVLVQSSLL               |
| TaCLE21a   | 1 | -----MVCCSRR-----                                                       | RDTPAAGGLGSG-----CLLIAVLVQSSLL               |
| TaCLE16a   | 1 | --MGRQRRWS-----RAALLACTVLI-----                                         | AAAACADSARPG-----PLAAAATEGLPAG               |
| TaCLE16d   | 1 | --MGRQRRWS-----RAALVACTVLI-----                                         | AAAACAESARPG-----PLAAA--TEGLPAG              |
| TaCLE16b   | 1 | --MGRQRRWS-----RAALLACTVLI-----                                         | AAA--CAESARPG-----PLAAA--SEGLPRG             |
| TaCLE27a   | 1 | --MGR--RPLA-----SAAAFVAAV-----                                          | LLVVVAVHVGAG-----VPSSSVMASVGN                |
| TaCLE27d   | 1 | --MGR--RPLA-----SAAAFVAAV-----                                          | LLVVVAVHVGAG-----VPSLSVMASAGNG               |
| TaCLE27b   | 1 | --MGR--RPLA-----SAVAFVAAV-----                                          | LVVVAGAVHVGAG-----VPSSSVMASAGNG              |
| TaCLE33b   | 1 | --MRR--RRWA-----RAAALC--ATA-----                                        | VLLQLAVHAGAG-----AWAARMPAFSTRA               |
| TaCLE4b    | 1 | --MGRRPDRS-----LGASACCCRVAV-----                                        | IFIVCHALLVVM-----VAMTSGAGVSGIPA              |
| TaCLE4d    | 1 | --MGRRPDRS-----LGASACCCRVAV-----                                        | IFIVCHALLVVM-----VATTSGAGVSLGPA              |
| TaCLE4a    | 1 | --MGRRPDRS-----LGASACCCRVAV-----                                        | IFIVCHALLVVM-----VATTSGAGVFGPA               |
| TaCLE22a   | 1 | --MGGTAAGR-----CRISGLAALVCAV-----                                       | LISAT--NANGIR-----TGAVGGTGAPGPAA             |
| TaCLE22d   | 1 | --MGGTAGGR-----CRISGLAALVCAV-----                                       | LISATTNANGIR-----TGAADGTGAPGPAA              |
| TaCLE25a   | 1 | MRGPAASGG-----RASAAA--VLEGV-----                                        | LVLVSLVVVVAE-----RPSTPAIRGRRMIL              |
| TaCLE25d   | 1 | MRGPAASGG-----RASAAAPAVLEGV-----                                        | LVLVSLVVVVAE-----RPSAPATGGRRMIL              |
| TaCLE25b   | 1 | MRGPAASGG-----RASAAA--VLEGV-----                                        | LVLVSLVVVVAE-----RPPAPATGGRRMIL              |
| TaCLE29b   | 1 | MATARCAGR-----WSAPAL--LELLI-----                                        | LLLCALVALVAV-----PLAALPGG-----               |
| TaCLE29d   | 1 | MATARCAGG-----WSAPALP--LELLI-----                                       | ALLCALVALVAA-----PLAAPPGETARLP               |
| TaCLE6a    | 1 | -----MAAARVG--IVLLVV-----                                               | MVIAAQLVATP-----E                            |
| TaCLE6d    | 1 | -----MAAARVG--IVLLVV-----                                               | MVIAAQLVAP-----E                             |
| TaCLE17a   | 1 | -----MAARIGAAVLCVV-----                                                 | LIVSLGIATPT-----E                            |
| TaCLE17b   | 1 | -----MAARIGAAVLCV-----                                                  | LIVSLGIATPT-----E                            |
| TaCLE17d   | 1 | -----MAARIGAAVLCMV-----                                                 | LIVSAGIVATPT-----E                           |
| TaCLE18a   | 1 | -----MAARVGAVVLCMV-----                                                 | LIVSAGIVATPT-----E                           |
| TaCLE18d   | 1 | -----MAARVGAVVLCMF-----                                                 | LIVSAGIVATPT-----E                           |
| TaCLE18b   | 1 | -----MAARIGAVVLCMV-----                                                 | LIVSAGIVATPT-----E                           |
| TaCLE13b   | 1 | -----MAHAADARSRCVV-----                                                 | AVLFVAVFLAC-----LPPAATAS--SS                 |
| TaCLE13d   | 1 | -----MAHAADARSRCVV-----                                                 | AVLFVAVFLAC-----LPPAATAS--SS                 |
| TaCLE13a   | 1 | -----MAHAHAARSRCVV-----                                                 | AVLFVAVFLAC-----LPPAATASASSS                 |
| TaCLE32b   | 1 | -----MASSRVAVLLELV-----                                                 | CTLGVARKMEEAR-----MMHKGEVVLGNGG              |
| TaCLE32d   | 1 | -----MASSRMVAVLLELV-----                                                | CTLGVARKMEEAR-----MMQKGDVVVVGNGG             |
| TaCLE32a   | 1 | -----MASURMAVLELV-----                                                  | CTLGVARKMEEAR-----MMQGEVVVVGNGG              |
| TaCLE7a.1  | 1 | -----MAKACILRGVG-----                                                   | LVVVALLLSPSF-----MAAEATGRKWDHG               |
| TaCLE7b.1  | 1 | -----MAKACILRGVV-----                                                   | LVVVALLLSSHF-----LAAEPAGROWDHG               |
| TaCLE7a.2  | 1 | -----MAKACILGGVV-----                                                   | MVVVALLLSSSF-----VAAEPGGRQWGHG               |
| TaCLE7b.2  | 1 | -----MAKACILRGVL-----                                                   | MVVVALLLSSSF-----VAAEPGGRQWAGH               |
| TaCLE7d    | 1 | -----MAKACILRGAT-----                                                   | LMVVALLLSSSF-----IAAEPAGROWDHG               |
| TaCLE8b.1  | 1 | -----MAKACILRGAA-----                                                   | LMVCTLLLLSSSF-----IVVEPAGROWDHG              |
| TaCLE8b.2  | 1 | -----MAKACILRCVV-----                                                   | LMVCTLLLLSSSF-----MAAETAGROWDHG              |
| TaCLE8a    | 1 | -----MAKACILRGAV-----                                                   | LIVCTLLLLSSSF-----MAAEPAGQLDHL               |
| TaCLE8d    | 1 | -----MAKACILRGAV-----                                                   | LMVVALLLSSAF-----VAAERAGQWDNG                |
| TaCLE11b   | 1 | -----MAKACILRRVV-----                                                   | LVVVALLLSSTF-----VVAEATGGQLDHG               |
| TaCLE11d   | 1 | -----MAMAKACVLCVV-----                                                  | LVVVALLLSSTF-----VVAEATFGQLDHG               |
| TaCLE9a    | 1 | -----MAKACILRGAV-----                                                   | LVVVALLVSSAS-----AAVEAAGRQRGHG               |
| TaCLE9d    | 1 | -----MAKACILRGAV-----                                                   | LVVVALLVSSAS-----ASAEAAGRQSGHG               |
| TaCLE12b   | 1 | -----MASACILRGTV-----                                                   | LVVVALLVSSAS-----AAREAAGRQRAHG               |
| TaCLE12d   | 1 | -----MASACILRGAV-----                                                   | LVVVALLVSSAS-----AAAAAAGRQRGHG               |
| TaCLE10b   | 1 | -----MAKTRVLRCAV-----                                                   | LVVVALLVSSAS-----AAAAAAGRQRGHG               |
| TaCLE10a   | 1 | -----MAKARVLRCAV-----                                                   | LVVVALLLSSAS-----AAAAAAGRQRGHG               |
| TaCLE10d   | 1 | -----MAKARVLRCAV-----                                                   | LMVVALLVSS-----EAAGRQRGHG                    |
| TaCLE19a   | 1 | MARTTGLG-----                                                           | FTICAVILLAAAV-----PLESARVLR----              |
| TaCLE19b   | 1 | MARTTGLG-----                                                           | FTICAVILLAAAV-----PLESARVLR----              |
| TaCLE19d   | 1 | MARTTSLG-----                                                           | FTICAVILLAAAV-----PLESARVLR----              |
| TaCLE23a   | 1 | -----MRLLLCFC-----                                                      | CFVLLI--AGSSP-----DPFSERCPLRH--              |
| TaCLE23d   | 1 | -----MRLLLCFC-----                                                      | CFVLLI--AGSSP-----DSHSERCPLQH--              |
| TaCLE23b   | 1 | -----MRLLLCFC-----                                                      | CFVLLI--AGSSS-----DSLSERCPLQH--              |
| TaCLE24a   | 1 | -----MTRLLLCFC-----                                                     | YCFVVLVAGSSP-----ADLLSGRCPLHH--              |
| TaCLE24d   | 1 | -----MTRLLPCFC-----                                                     | YCFVVLVLAGSSP-----ADPLSGRCPLHHH              |
| TaCLE24b   | 1 | -----MMRLIPCFC-----                                                     | VCLVVVLVVGSSP-----ADLLAGRCPLHH--             |
| TaCLE31a   | 1 | -----MKLVMLC-----                                                       | FIIVLVI--TSSP-----IAVSGDRPLMLG               |
| TaCLE31d   | 1 | -----MKLVMLC-----                                                       | FIIVLVI--TASP-----IAVSGDRPLMLG               |
| TaCLE31b   | 1 | -----MKLVMLC-----                                                       | FIIVLVI--ASSP-----IPVSGDRPLMLG               |
| TaCLE34a   | 1 | -----MPAAVCAV-----                                                      | LVLILLS--AVSR-----CEADLLQVTVAGG              |
| TaCLE34d.1 | 1 | -----MPAAVCAV-----                                                      | LILLILLSV-AVPC-----CEADLLQVTVSGG             |
| TaCLE35a   | 1 | -----MP-AVCAV-----                                                      | LILLILLS-AASR-----CEADLLQVTVAG-              |
| TaCLE35b.1 | 1 | -----MP-AVCAV-----                                                      | LILLILLS-AASR-----CEADLLQVTVAG-              |
| TaCLE35b.2 | 1 | -----MP-AVCAV-----                                                      | LILLILLS-AASR-----CKADHLQVTVAG-              |
| TaCLE35d   | 1 | -----MP-AVCAV-----                                                      | LILLILLS-AASR-----CEADHLQVTVAG-              |
| TaCLE34d.2 | 1 | -----MP-AVCAV-----                                                      | LILLILLS-AVSR-----CEANLLQVTVGG-              |

## Central variable domain

|            |    |                                                |                                                         |                                      |
|------------|----|------------------------------------------------|---------------------------------------------------------|--------------------------------------|
| TaCLE1a    | 61 | RSLDPSS-----                                   | ---AAGAPQDQHHHHHQHHHHHRAGHHHRQRHHRLPSKWNWQRVPPSAAPGD--  | GEE--VDPRY--VE-----                  |
| TaCLE1d    | 61 | QSLDPSS-----                                   | ---AAGAPQDQHHHH---HHHHHRGGHHHRQRHHRLPSKWNWQRVPPSAAPGD-- | GQE-IDPRY--VE-----                   |
| TaCLE1b    | 59 | RSLDPSS-----                                   | ---AAGAPQDQQRHH---HHHHHRGGRRHQRHHRLPSKWNWQRLPPSAAPGD--  | GEE--VDPRY--VE-----                  |
| TaCLE15a   | 42 | RGATPT-----                                    | ---GRTPST-----                                          | TTTTTATRAGG-AAA--AAL--DS-----        |
| TaCLE15b   | 42 | RGPTPT-----                                    | ---GRPST-----                                           | TTTTTATRAGG-AAA--AAL--DS-----        |
| TaCLE15d   | 42 | RGATPT-----                                    | ---GRTPS-----                                           | TTTTTATRAGG-AAA--AAL--DS-----        |
| TaCLE28b   | 51 | TAAAAAR-----                                   | ---KRGGTVLQ-----                                        | TGPPAAACTGE--AGG--AAYDS-----         |
| TaCLE28d   | 51 | TAAAAAR-----                                   | ---KRGRTVLQ-----                                        | TGPPAAACAGE--AGG--AAYDS-----         |
| TaCLE3b    | 40 | --AALDG-----                                   | ---APPPKGYFAEQ-----                                     | SSSTARQHTARV--YRR--MHRVS-----        |
| TaCLE3d    | 40 | --ALVGG-----                                   | ---GPPPKAYSSEQA-----                                    | SLSTARQHTARV--YRR--MHTVS-----        |
| TaCLE3a    | 42 | --ALVGG-----                                   | ---GPPPKAYSSEQS-----                                    | SSSTSREHTARV--YRR--MHRVS-----        |
| TaCLE30b   | 46 | --ELITG-----                                   | ---QHELPTISPTQE-----                                    | AGGDDVAAADDI--GAG--KFTVS-----        |
| TaCLE30d   | 44 | --ELIKG-----                                   | ---QHELPTISPTQE-----                                    | AGGDDVAAADDI--GAG--KFTVS-----        |
| TaCLE30a   | 45 | --ELIKG-----                                   | ---QHELPTISPTQQ-----                                    | AGGDDVAAANDI--GAG--KFTVS-----        |
| TaCLE5a    | 69 | RRALRGG-----                                   | ---ARHRHH--RHHHR-----                                   | QGAPAVPLPPP--GRDEVDMRYEVS-----       |
| TaCLE5d    | 73 | RRVLRGG-----                                   | ---ARHRHGGHHHH-----                                     | QGAPTVPLPPP--GRDEVDMRYEVS-----       |
| TaCLE5b    | 72 | RRALRGG-----                                   | ---ARHRHGGHHHHQ-----                                    | QGAPAVPLPPP--GRDEVDMRYEVS-----       |
| TaCLE2a    | 36 | RTGVLAP-----                                   | ---VPAEQWRQERRR-----                                    | TVGRQTRGGRATT-IAPFAPRRFE-----GFFRDD  |
| TaCLE2d    | 36 | RTGVLAP-----                                   | ---VQAEQWRQERRR-----                                    | TAGRQARGGRATT-IAPFAPRRFE-----GFFRDD  |
| TaCLE2b    | 35 | RAGVLAP-----                                   | ---VQAEQWRQORRR-----                                    | TAG--QAQGGRT--IAPFAPRRFE--GAAGGFFRDD |
| TaCLE20a   | 45 | AARSASV-----                                   | ---VVSGBHGHKTPE-----                                    | GAALAAARPRSG--AGGG--VFG-----DD       |
| TaCLE20d   | 45 | AARRAS-----                                    | ---VVAGSBHVTSE-----                                     | GAALAAARNRNG--AGVG--GFG-----DD       |
| TaCLE20b   | 39 | ATRSAS-----                                    | ---VSDSBHGHKTSE-----                                    | GAALAAARFRSG--ASVG--GFG-----DD       |
| TaCLE14b   | 45 | QPRRLVE-----                                   | ---AGGNCPAASLD-----                                     | ASGKPVAAAGSS--PPPT--VFDADR-----MS    |
| TaCLE14d   | 45 | QPQLVE-----                                    | ---AGGNCPAASLD-----                                     | ASGKPVAAAGPS--PPPT--VFDADR-----MS    |
| TaCLE14a   | 45 | QPRRLVE-----                                   | ---AGGNCPVASFD-----                                     | ASGKPVAAAGPS--PPPT--MFDADR-----MS    |
| TaCLE21b   | 33 | GSTFLLA-----                                   | ---V--DAARTSAFM-----                                    | AMA-PLPAVAMA--PSPS--GLKDD-----       |
| TaCLE21d   | 33 | GSTFLLA-----                                   | ---V--DAARTSAFM-----                                    | AMA-PLPAVAMA--PSPS--GLKDD-----       |
| TaCLE21a   | 33 | GSTFLLA-----                                   | ---V--DAARTSAFM-----                                    | AMA-PLPAVAMA--PSPS--GLKDD-----       |
| TaCLE16a   | 45 | ASVSASG-----                                   | ---NEDGGDCPRRSAFD-----                                  | ALVEGLVSI GLG--RRWRAGDGVGLVD-----GD  |
| TaCLE16d   | 44 | AMESAS-----                                    | ---IDGGDCPRRSAFD-----                                   | VLVEGLVSI GLG--RRWRAGDGVGLVD-----GD  |
| TaCLE16b   | 43 | ASVSAD-----                                    | ---DSGGDCPRRSAFD-----                                   | VLVEGLVSI GLG--RRWRAGDGVGLVD-----GD  |
| TaCLE27a   | 44 | RGRAVV-----                                    | ---ATATFDDAAR-----                                      | CKEQRKKKAGG--AAAWARGDDED-----DD      |
| TaCLE27d   | 44 | RGRAVV-----                                    | ---ATATFDDAAR-----                                      | CKEQRKKKAGG--AVAWAGYGDDED-----DD     |
| TaCLE27b   | 44 | RGRAVV-----                                    | ---ATASFDAAR-----                                       | CKEQRKKKAGG--AAAWAGDGDDED-----DD     |
| TaCLE33b   | 43 | RGRAAQRWPSMPVHHAVPKPSPRAGARAVAFDATATAAAAR----- | ---CNSKSKTSAAWKRKPTAGGRDDA-----CDE-----DD               |                                      |
| TaCLE4b    | 48 | RARGRVTMSSP-----                               | ---AQKSGGGGCGGEDAYR-----                                | SKRRIPKGPDP-----IHN-----             |
| TaCLE4d    | 48 | RARGGV-----                                    | ---AQKSGGGGCGGEDAYR-----                                | SKRRIPKGPDP-----IHN-----             |
| TaCLE4a    | 48 | QGGRVSTKSSP-----                               | ---VQKPGGGGCGGEDAYR-----                                | SKRRIPKGPDP-----IHN-----             |
| TaCLE22a   | 47 | AAAQAATLAAAPP-----                             | ---VAAAATTPPSEGALEDPYK-----                             | NSKRKVPNGPDP-----IHN-----            |
| TaCLE22d   | 48 | AAAQAATLAAAPP-----                             | ---VAAAAMAPPSEGALEDPYK-----                             | NSKRKVPNGPDP-----IHN-----            |
| TaCLE25a   | 47 | AGDGGETR-----                                  | ---MTLEDFR--ADDPFQ-----                                 | DSARRVPNGPDP-----IHN-----            |
| TaCLE25d   | 49 | PGDGGEAR-----                                  | ---RTLEDFR--ADDPFQ-----                                 | DSARRVPNGPDP-----IHN-----            |
| TaCLE25b   | 47 | AGDGGEAR-----                                  | ---RTLENFR--ADDPFQ-----                                 | DSARRVPNGPDP-----IHN-----            |
| TaCLE29b   | 41 | DAAAGRR-----                                   | ---ALVPAAR--SGRFR-----                                  | PRPRRW-NSAGL-----VDS-----            |
| TaCLE29d   | 47 | PAASSSSF-----                                  | ---PVAAGGRRFAGGPR-----                                  | SRARRW-NSAGL-----ADS-----            |
| TaCLE6a    | 26 | PLRIQHPA-----                                  | ---VALRHAANGK-----                                      | PAGVPPSKWNMPRTLGA--AV-----           |
| TaCLE6d    | 26 | ARLIQHPA-----                                  | ---VALRHTAANGK-----                                     | PAGVPPAKWNMRRTLGA--AV-----           |
| TaCLE17a   | 27 | ARAVAGVV-----                                  | ---YAAAVANAAGA-----                                     | AAATSGAGVPPGRWN-ARRLQGDGAH-----      |
| TaCLE17b   | 27 | ARAVAGVV-----                                  | ---YAAAVTNAAGA-----                                     | AAATGGAGVPPGRWN-ARRLQGDGAH-----      |
| TaCLE17d   | 27 | ARAVAHVL-----                                  | ---YAAAVTNAVGA-----                                     | AS--GAGVRPGRWN-ARRLQGDGAH-----       |
| TaCLE18a   | 27 | ARAVPDVV-----                                  | ---YAAAG-----                                           | GGIRRGKWN SARLEGDGAH-----            |
| TaCLE18d   | 27 | ARAVPDVV-----                                  | ---YSAAGNAA-----                                        | GGGIRRGKWN SARLEGDGAH-----           |
| TaCLE18b   | 27 | ARAVADV-----                                   | ---YAAATNAA-----                                        | AGGIRRGKWN SARLEGDGAH-----           |
| TaCLE13b   | 36 | SRSAAAAAL-----                                 | ---QRVEMAAMYP-----                                      | QDLQEKPDVTKDAEEDVSTTGFGEE-----       |
| TaCLE13d   | 36 | SRSAAAAAL-----                                 | ---QRVEMAAYTP-----                                      | QDLQEKPDVTKDAEEDVSTTGFGEE-----       |
| TaCLE13a   | 38 | SRAAAAAAL-----                                 | ---QRVEMAAMYP-----                                      | QDLQEKPDVTKDAEEDVSTTGFGEE-----       |
| TaCLE32b   | 40 | GGGGGGNA-----                                  | ---LQHGLVDGHRP-----                                     | RHVASFTTGDVVVEAPSSQAAGGDGA-----      |
| TaCLE32d   | 40 | GGGGGGNA-----                                  | ---LQHLVD-----                                          | DAPSSQAAGGDGA-----                   |
| TaCLE32a   | 40 | DGGR--NA-----                                  | ---LQHGFVDGHRP-----                                     | RPVASLTMGDDVVEAPSSQAAGGDGA-----      |
| TaCLE7a.1  | 38 | ---REAT-----                                   | ---VVMMPMAGG-----                                       | HFARKVLRREEMVQADGD--VDIIGCS-----     |
| TaCLE7b.1  | 38 | ---RGAT-----                                   | ---VLTMTMARG-----                                       | RFARKVLRREEMVQADGD--VDIIGCS-----     |
| TaCLE7a.2  | 38 | ---REAT-----                                   | ---VLTMTMARG-----                                       | RFVRKVLREEMVQADDN-DVVDIIGCS-----     |
| TaCLE7b.2  | 38 | ---REAT-----                                   | ---VLTMTMARG-----                                       | RFVRKVLREEMVQADDN-GVVDIIGCS-----     |
| TaCLE7d    | 38 | GGRWGT-----                                    | ---VLTMLTRG-----                                        | RFVRKVLREEMVQADDN-GVVDIIGCS-----     |
| TaCLE8b.1  | 38 | TN--KAA-----                                   | ---VLTMTVATG-----                                       | RFVRKVLREEVIEVDDD-GVVDIIGCS-----     |
| TaCLE8b.2  | 38 | T---KAT-----                                   | ---VLTMTMATG-----                                       | RFVRKVLREEVVEVDDD-GVVDIIGCS-----     |
| TaCLE8a    | 38 | R---KAT-----                                   | ---VLTMTMAAG-----                                       | RFVRNVLREEVVQADDVNGVVDIGDS-----      |
| TaCLE8d    | 38 | R---KAT-----                                   | ---VLTMTMATG-----                                       | HLVRKVLREEVVQANNN-GVVDIIGCS-----     |
| TaCLE11b   | 38 | R---KAT-----                                   | ---VLTMTMATK-----                                       | RLVRKLLQEEVVQADDN-GVVDIIGCS-----     |
| TaCLE11d   | 40 | R---KAT-----                                   | ---VLTMTMATR-----                                       | RFVRKVLREEVVQADDN-GVVDIIGCS-----     |
| TaCLE9a    | 38 | R---EAT-----                                   | ---APAMAMARG-----                                       | PFVRKVLREEMVKADGQ--GDIIGCS-----      |
| TaCLE9d    | 38 | R---EAT-----                                   | ---APAMAMARG-----                                       | PFVRKVLREEMVKADGQ--GDIIGCS-----      |
| TaCLE12b   | 38 | R---EAT-----                                   | ---APAMAMARG-----                                       | RFVMKVLREEMVQADGQ--GDIIGCS-----      |
| TaCLE12d   | 38 | R---EAT-----                                   | ---APAMAMAAGG-----                                      | RFVRKVLREEMVQAGRQ--GDIIGCS-----      |
| TaCLE10b   | 38 | R---EAT-----                                   | ---APAMAMATG-----                                       | RFVRKVLREEMVQADGH--GDIIGCS-----      |
| TaCLE10a   | 38 | R---EAT-----                                   | ---APAMATAKG-----                                       | RFVRMVLREEMVQANGQ--GGIIGES-----      |
| TaCLE10d   | 33 | R---EATA-----                                  | ---APAMAMARG-----                                       | RFVTKVLREEMVQANGQ--GGIIGES-----      |
| TaCLE19a   | 31 | ---EAP-----                                    | ---SATGGTG-----                                         | VTEVSMKVPDEGGRQ--VGKABES-----        |
| TaCLE19b   | 31 | ---EAP-----                                    | ---SATGGTG-----                                         | VTEVSMKVPDEGGRQ--VGKABES-----        |
| TaCLE19d   | 31 | ---EAP-----                                    | ---SATDGAG-----                                         | VTEVSMKVPDEGGRQ--VGKABES-----        |
| TaCLE23a   | 32 | RRQLQDV-----                                   | ---VVRLQA-----                                          | ASTAFAAR--PRQEGIADPVYETS-----        |
| TaCLE23d   | 32 | RRQLQDV-----                                   | ---VVRLQATAA-----                                       | ASTAAAAAR--PRQEGIADPVYETS-----       |
| TaCLE23b   | 32 | RRQLHVD-----                                   | ---VVRLQATAA-----                                       | ASTAAAVG--PRQE-IADPVYETS-----        |
| TaCLE24a   | 35 | RRQLEDVD-----                                  | ---RGG--PAV-----                                        | ASTTAAVR--PPQEIADLVVYETS-----        |
| TaCLE24d   | 36 | RRQLEDVD-----                                  | ---GGGLQATAT-----                                       | ASTTAAVR--PPQEIADLVVYETS-----        |
| TaCLE24b   | 35 | RRQLEDVD-----                                  | ---SGGLQATAT-----                                       | ASTTAAVR--PPQEIADLVVYETS-----        |
| TaCLE31a   | 32 | RRCLQDTV-----                                  | ---VIGGGPTPTG-----                                      | ASTTGTL--PRDAEPDISVD-RS-----         |
| TaCLE31d   | 32 | RRCLQDAV-----                                  | ---VIGGSPPTTG-----                                      | ASTTGTL--PRDAEPDISVD-RS-----         |
| TaCLE31b   | 32 | RRWLQDAV-----                                  | ---VIGGSPPTTA-----                                      | ASTTGTL--PRDAEPDISVD-RS-----         |
| TaCLE34a   | 33 | RRMLAGGS-----                                  | ---NAARAFSRPT-----                                      | ETTAGSSSWRAADGRATAAMPYSES-----       |
| TaCLE34d.1 | 32 | RRMLAGGS-----                                  | ---NAAALSROV-----                                       | ETTAASSTWRAAGRATAAMPYSES-----        |
| TaCLE35a   | 32 | RRMLAGGS-----                                  | ---NLAVFVSREA-----                                      | ATTVASSARQSAAGR--AAMPYSES-----       |
| TaCLE35b.1 | 32 | RRMLAGGS-----                                  | ---NAGTIFSREA-----                                      | ATTVASSARRSAAGR--AAMPYSES-----       |
| TaCLE35b.2 | 32 | RRMLAGGS-----                                  | ---NLAVFVSREA-----                                      | ETTVASSARRSAAGR--AAMPYSES-----       |
| TaCLE35d   | 32 | RRMLAGGS-----                                  | ---NATTVYSREA-----                                      | ATAVANSARRSADGR--AAMPYSES-----       |
| TaCLE34d.2 | 31 | RRMLAGGS-----                                  | ---NAAVFSPSPA-----                                      | ETTAASTMRWAAAGRATAAMPYSES-----       |

## CLE domain

|            |     |                                                                 |
|------------|-----|-----------------------------------------------------------------|
| TaCLE1a    | 128 | KRLVPTGGNP <del>PHH</del> -----                                 |
| TaCLE1d    | 126 | KRLVPTGGNP <del>PHH</del> -----                                 |
| TaCLE1b    | 124 | KRLVPTGGNP <del>PHH</del> -----                                 |
| TaCLE15a   | 74  | KRLVPTGGNP <del>PHN</del> -----                                 |
| TaCLE15b   | 74  | KRLVPTGGNP <del>PHN</del> -----                                 |
| TaCLE15d   | 76  | KRLVPTGGNP <del>PHN</del> -----                                 |
| TaCLE28b   | 86  | KRMVPTGGNP <del>PHN</del> -----                                 |
| TaCLE28d   | 86  | KRMVPTGGNP <del>PHN</del> -----                                 |
| TaCLE3b    | 78  | KRLVPTGGNP <del>PHN</del> -----                                 |
| TaCLE3d    | 78  | KRLVPTGGNP <del>PHN</del> -----                                 |
| TaCLE3a    | 80  | KRLVPTGGNP <del>PHN</del> -----                                 |
| TaCLE30b   | 84  | RRAVPTGGNP <del>PHN</del> -----                                 |
| TaCLE30d   | 82  | RRAVPTGGNP <del>PHN</del> -----                                 |
| TaCLE30a   | 83  | RRAVPTGGNP <del>PHN</del> -----                                 |
| TaCLE5a    | 110 | KRRVPTGGNP <del>PHN</del> -----                                 |
| TaCLE5d    | 115 | KRRVPTGGNP <del>PHN</del> -----                                 |
| TaCLE5b    | 116 | KRRVPTGGNP <del>PHN</del> -----                                 |
| TaCLE2a    | 84  | KRFAP <del>T</del> GGNP <del>LHNL</del> -----                   |
| TaCLE2d    | 84  | KRFAP <del>T</del> GGNP <del>LHNL</del> -----                   |
| TaCLE2b    | 85  | KRFAP <del>T</del> GGNP <del>LHNL</del> -----                   |
| TaCLE20a   | 85  | KRMAP <del>S</del> GGNP <del>LHNR</del> -----                   |
| TaCLE20d   | 84  | KRMAP <del>S</del> GGNP <del>LHNL</del> -----                   |
| TaCLE20b   | 77  | KRMAP <del>S</del> GGNP <del>LHNL</del> -----                   |
| TaCLE14b   | 88  | KRRVR <del>R</del> GS <del>D</del> P <del>T</del> HNKC-----     |
| TaCLE14d   | 88  | KRRVR <del>R</del> GS <del>D</del> P <del>T</del> HNKC-----     |
| TaCLE14a   | 88  | KRRVR <del>R</del> GS <del>D</del> P <del>T</del> HNKC-----     |
| TaCLE21b   | 70  | KRRVPTG <del>A</del> NP <del>LHNR</del> -----                   |
| TaCLE21d   | 70  | KRRVPTG <del>A</del> NP <del>LHNR</del> -----                   |
| TaCLE21a   | 70  | KRRVPTG <del>A</del> NP <del>LHNR</del> -----                   |
| TaCLE16a   | 93  | KRRVPTGGNP <del>LHNR</del> -----                                |
| TaCLE16d   | 90  | KRRVPTGGNP <del>LHNR</del> -----                                |
| TaCLE16b   | 89  | KRRVPTGGNP <del>LHNR</del> -----                                |
| TaCLE27a   | 83  | KRVVPTGGNP <del>LHNR</del> -----                                |
| TaCLE27d   | 85  | KRVVPTGGNP <del>LHNR</del> -----                                |
| TaCLE27b   | 85  | KRVVPTGGNP <del>LHNR</del> -----                                |
| TaCLE33b   | 113 | KRRIP <del>T</del> GGNP <del>LHNR</del> -----                   |
| TaCLE4b    | 90  | RRAGKTTIA <del>P</del> RRRD-----                                |
| TaCLE4d    | 85  | RRAGKTTIA <del>P</del> RRRD-----                                |
| TaCLE4a    | 90  | RRAGKTTIA <del>P</del> RRRD-----                                |
| TaCLE22a   | 95  | RRARW <del>E</del> DAPARRV-----                                 |
| TaCLE22d   | 96  | RRARW <del>E</del> DAPARRV-----                                 |
| TaCLE25a   | 83  | RGAGKSG <del>R</del> SPGRE-----                                 |
| TaCLE25d   | 85  | RGAGKSG <del>R</del> SPGRE-----                                 |
| TaCLE25b   | 83  | RGAGKSG <del>R</del> SPGRA-----                                 |
| TaCLE29b   | 75  | KHEVPTGGNP <del>DSNR</del> -----                                |
| TaCLE29d   | 84  | KHEVPTGGNP <del>DSNR</del> -----                                |
| TaCLE6a    | 63  | KRTVPGGP <del>D</del> PCHHY-----                                |
| TaCLE6d    | 64  | KRTVPGGP <del>D</del> PCHHY-----                                |
| TaCLE17a   | 71  | KREVPGGP <del>D</del> PCHHH-----                                |
| TaCLE17b   | 71  | KREVPGGP <del>D</del> PCHHH-----                                |
| TaCLE17d   | 69  | KREVPGGP <del>D</del> PCHHH-----                                |
| TaCLE18a   | 61  | KREVPGGP <del>D</del> PCHHH-----                                |
| TaCLE18d   | 65  | KREVPGGP <del>D</del> PCHHH-----                                |
| TaCLE18b   | 65  | KREVPGGP <del>D</del> PCHHH-----                                |
| TaCLE13b   | 81  | BREVPTGGP <del>D</del> THH <del>B</del> GR <del>E</del> PRRRQSP |
| TaCLE13d   | 81  | BREVPTGGP <del>D</del> THH <del>B</del> GR <del>E</del> PRRRQSP |
| TaCLE13a   | 83  | BREVPTGGP <del>D</del> THH <del>B</del> GR <del>E</del> PRRRQSP |
| TaCLE32b   | 85  | KREVPGGP <del>D</del> THH <del>B</del> GSVPPTSVAP               |
| TaCLE32d   | 68  | DREVPGGP <del>D</del> THH <del>B</del> GSVPPTSVAP               |
| TaCLE32a   | 83  | KREVPGGP <del>D</del> THH <del>B</del> GSIPPNSVAP               |
| TaCLE7a.1  | 74  | KRKSPGGP <del>D</del> PCHH-----                                 |
| TaCLE7b.1  | 74  | KRKSPGGP <del>D</del> PCHH-----                                 |
| TaCLE7a.2  | 76  | KRKSPGGP <del>D</del> PCHH-----                                 |
| TaCLE7b.2  | 76  | KRKSPGGP <del>D</del> PCHH-----                                 |
| TaCLE7d    | 79  | KRKSPGGP <del>D</del> PCHH-----                                 |
| TaCLE8b.1  | 77  | KRKSPGGP <del>D</del> PCHH-----                                 |
| TaCLE8b.2  | 76  | KRKSPGGP <del>D</del> PCHH-----                                 |
| TaCLE8a    | 77  | KRKSPGGP <del>D</del> PCHH-----                                 |
| TaCLE8d    | 76  | KRKSPGGP <del>D</del> PCHH-----                                 |
| TaCLE11b   | 76  | KRKSPGGP <del>D</del> PCHH-----                                 |
| TaCLE11d   | 78  | KRKSPGGP <del>D</del> PCHH-----                                 |
| TaCLE9a    | 75  | KRTSPGGP <del>D</del> PCHH-----                                 |
| TaCLE9d    | 75  | KRTSPGGP <del>D</del> PCHH-----                                 |
| TaCLE12b   | 75  | KRTSPGGP <del>D</del> PCHH-----                                 |
| TaCLE12d   | 76  | KRTSPGGP <del>D</del> PCHH-----                                 |
| TaCLE10b   | 75  | KRTSPGGP <del>D</del> PCHH-----                                 |
| TaCLE10a   | 75  | KRTSPGGP <del>D</del> PCHH-----                                 |
| TaCLE10d   | 71  | KRTSPGGP <del>D</del> PCHH-----                                 |
| TaCLE19a   | 63  | KRLSPGGSDP <del>P</del> CHH-----                                |
| TaCLE19b   | 63  | KRLSPGGSDP <del>P</del> CHH-----                                |
| TaCLE19d   | 63  | KRLSPGGSDP <del>P</del> CHH-----                                |
| TaCLE23a   | 67  | KRLSPGGSNP <del>P</del> CHHR-----                               |
| TaCLE23d   | 70  | KRLSPGGSNP <del>P</del> CHHR-----                               |
| TaCLE23b   | 69  | KRVSPGGSNP <del>P</del> CHHR-----                               |
| TaCLE24a   | 71  | KRLSPGGSNP <del>P</del> CHHR-----                               |
| TaCLE24d   | 76  | KRLSPGGSNP <del>P</del> CHHR-----                               |
| TaCLE24b   | 75  | KRLSPGGSNP <del>P</del> CHHR-----                               |
| TaCLE31a   | 70  | KRLSPGGSNP <del>P</del> CHH-----                                |
| TaCLE31d   | 70  | KRLSPGGSNP <del>P</del> CHH-----                                |
| TaCLE31b   | 70  | KRLSPGGSNP <del>P</del> CHH-----                                |
| TaCLE34a   | 76  | KRSSPGGP <del>D</del> PCHH-----                                 |
| TaCLE34d.1 | 76  | KRSSPGGP <del>D</del> PCHH-----                                 |
| TaCLE35a   | 73  | KRSSPGGP <del>D</del> PCHH-----                                 |
| TaCLE35b.1 | 73  | KRSSPGGP <del>D</del> PCHH-----                                 |
| TaCLE35b.2 | 73  | KRSSPGGP <del>D</del> PCHH-----                                 |
| TaCLE35d   | 73  | KRSSPGGP <del>D</del> PCHH-----                                 |
| TaCLE34d.2 | 74  | KRSSPGGP <del>D</del> PCHH-----                                 |
| consensus  | 201 | kr pggp p hh                                                    |
