# Supplementary material for: Identification and Functional Analysis of the CLAVATA3/EMBRYO SURROUNDING REGION (CLE) Gene Family in Wheat
Source: Int J Mol Sci. 2019 Sep 3;20(17):4319. doi: 10.3390/ijms20174319 (PMC6747155; doi:10.3390/ijms20174319)
Supplement: Supplementary file 1 [file ijms-20-04319-s001.zip]

Archive with 6 entries (6 files):
- Supplementary Table S2.xls
- Supplementary Table S3.pdf
- Supplementary Table S4.docx
- Supplementary Figure S1.pdf
- Supplementary Figure S2-S6.pdf
- Supplementary Table S1.docx
