# Supplementary material for: Identification and Functional Analysis of the CLAVATA3/EMBRYO SURROUNDING REGION (CLE) Gene Family in Wheat
Source: Int J Mol Sci. 2019 Sep 3;20(17):4319. doi: 10.3390/ijms20174319 (PMC6747155; doi:10.3390/ijms20174319)
Supplement: Supplementary file 1 [file ijms-20-04319-s001.zip › Supplementary Table S2.xls]

## Sheet: 新建 Microsoft Excel 97-2003 工作表 
Supplementary Table S3 Comparison of DNA sequence similarity of multiple copy genes
Gene Name	DNA sequence similarity
TaCLE1a	0.9281
TaCLE1b
TaCLE1d
TaCLE2a	0.9216
TaCLE2b
TaCLE2d
TaCLE3a	0.9151
TaCLE3b
TaCLE3d
TaCLE4a	0.9086
TaCLE4b
TaCLE4d
TaCLE5a	0.9021
TaCLE5b
TaCLE5d
TaCLE6a	0.9368
TaCLE6d
TaCLE7a.1	0.8271
TaCLE7b.1
TaCLE7a.2
TaCLE7b.2
TaCLE7d
TaCLE8a
TaCLE8b.1
TaCLE8b.2
TaCLE8d
TaCLE9a
TaCLE9d
TaCLE10a
TaCLE10b
TaCLE10d
TaCLE11b
TaCLE11d
TaCLE12b
TaCLE12d
TaCLE13a	0.9709
TaCLE13b
TaCLE13d
TaCLE14a	0.9647
TaCLE14b
TaCLE14d
TaCLE15a	0.9585
TaCLE15b
TaCLE15d
TaCLE16a	0.9523
TaCLE16b
TaCLE16d
TaCLE17a	0.9461
TaCLE17b
TaCLE17d
TaCLE18a	0.9737
TaCLE18b
TaCLE18d
TaCLE19a
TaCLE19b
TaCLE19d
TaCLE20a	0.9167
TaCLE20b
TaCLE20d
TaCLE21a	0.9881
TaCLE21b
TaCLE21d
TaCLE22a	0.945
TaCLE22d
TaCLE23a	0.9458
TaCLE23b
TaCLE23d
TaCLE24a	0.9432
TaCLE24b
TaCLE24d
TaCLE25a	0.9406
TaCLE25b
TaCLE25d
TaCLE26a	0.8406
TaCLE26d
TaCLE27a	0.9731
TaCLE27b
TaCLE27d
TaCLE28b	0.9832
TaCLE28d
TaCLE30a	0.9633
TaCLE30b
TaCLE30d
TaCLE31a	0.9759
TaCLE31b
TaCLE31d
TaCLE32a	0.9885
TaCLE32b
TaCLE32d
TaCLE34a	0.8644
TaCLE34d.1
TaCLE34d.2
TaCLE35a
TaCLE35b.1
TaCLE35b.2
TaCLE35d
